# Supplementary material for: Heterometallic cubane-type clusters [M′Mo3S4] (M′ = Au, Ag and Cu): synthesis, structures and electrochemical properties
Source: Royal Society of Chemistry journal article supplement (doi:10.1039/b921176d), 2010-01-01

## Supplementary Information for

# Heterometallic cubane-type clusters $[M'Mo_3S_4]$ ( $M' = Au, Ag$ and $Cu$ ): synthesis, structures and electrochemical properties

Pingping Chen, Yanhui Chen, Yuhan Zhou, Ying Peng, Jingping Qu\* and Masanobu Hidai

State Key Laboratory of Fine Chemicals, School of Chemical Engineering, Dalian University of Technology, Dalian 116012, P. R. China

## Contents

**S Fig. 1** Cyclic voltammogram of **1** with 1.0 mM cluster in a  $CH_3CN$  solution (0.05 M  $nBu_4NPF_6$ ) and 1 equiv ferrocene at a scan rate of  $100\text{ mV}\cdot\text{s}^{-1}$ .

**S Fig. 2** Cyclic voltammogram of **2a** with 1.0 mM cluster in a  $CH_3CN$  solution (0.05 M  $nBu_4NPF_6$ ) and 1 equiv ferrocene at a scan rate of  $100\text{ mV}\cdot\text{s}^{-1}$ .

**S Fig. 3** Cyclic voltammogram of **2b** with 1.0 mM cluster in a  $CH_3CN$  solution (0.05 M  $nBu_4NPF_6$ ) and 1 equiv ferrocene at a scan rate of  $100\text{ mV}\cdot\text{s}^{-1}$ .

**S Fig. 4** Cyclic voltammogram of **2c** with 1.0 mM cluster in a  $CH_3CN$  solution (0.05 M  $nBu_4NPF_6$ ) and 1 equiv ferrocene at a scan rate of  $100\text{ mV}\cdot\text{s}^{-1}$ .

**S Fig. 5** Cyclic voltammogram of **4** with 1.0 mM cluster in a  $CH_3CN$  solution (0.05 M  $nBu_4NPF_6$ ) and 1 equiv ferrocene at a scan rate of  $100\text{ mV}\cdot\text{s}^{-1}$ .

**S Fig. 1**

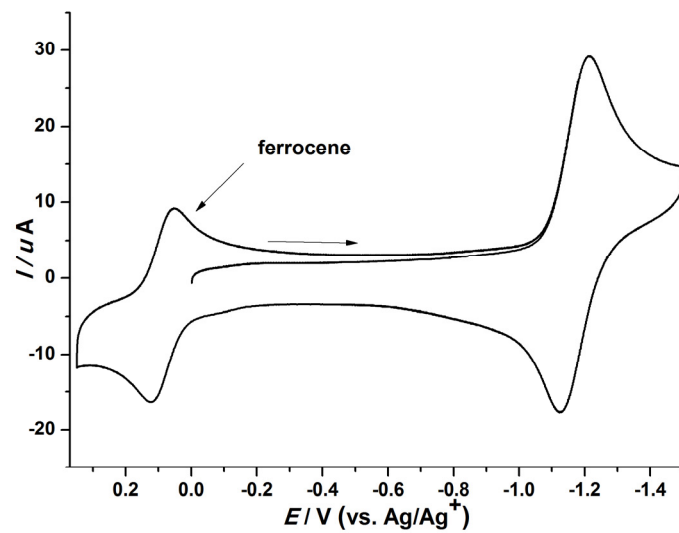

**S Fig. 2**

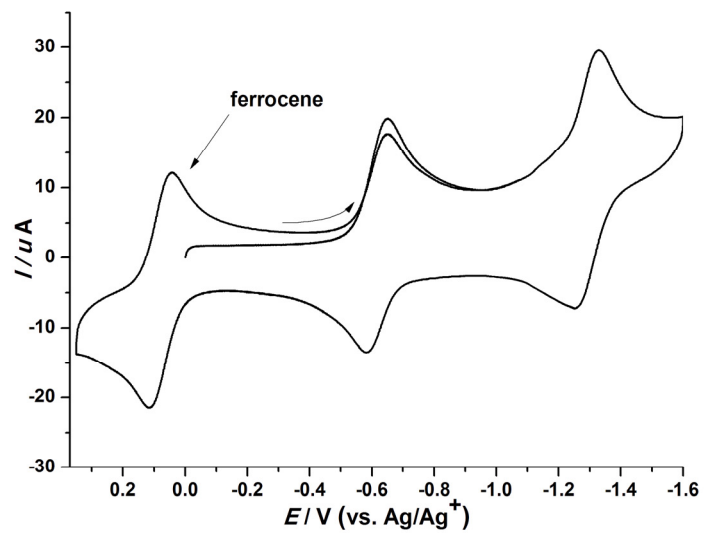

**S Fig. 3**

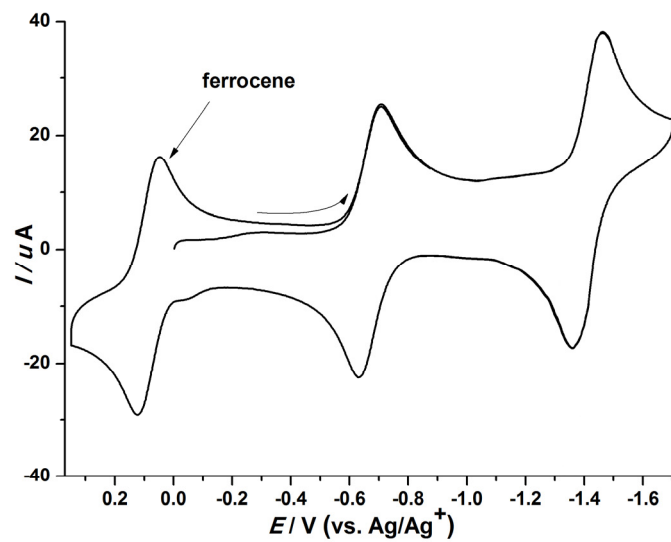

**S Fig. 4**

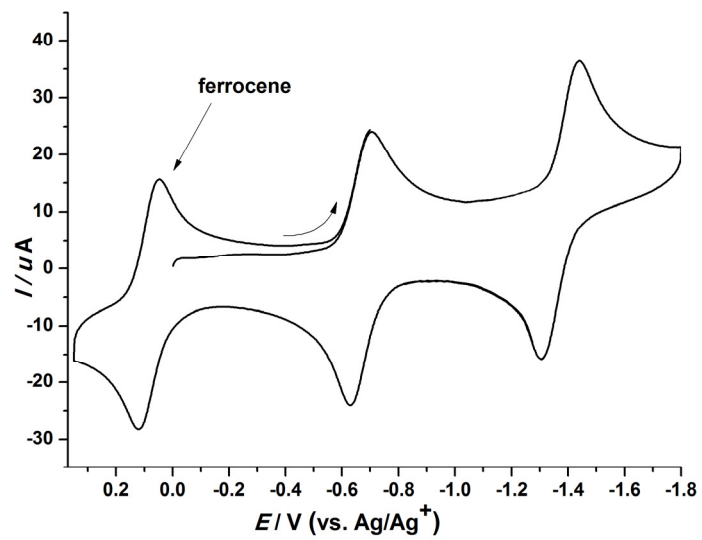

**S Fig. 5**

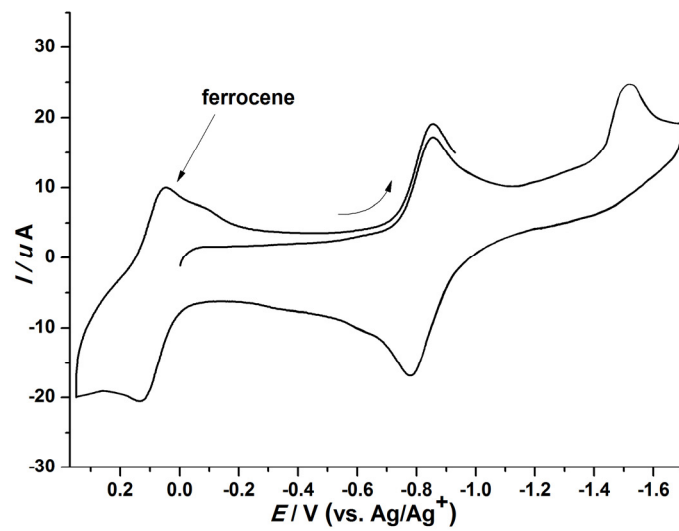

Supplement: b921176d.pdf [file b921176d.pdf]
